# Supplementary material for: Aquaporin 3 maintains the stemness of CD133+ hepatocellular carcinoma cells by activating STAT3
Source: PubMed Central journal article supplement (PMC6565673; doi:10.1038/s41419-019-1712-0), 2019-06-13
Supplement: 41419_2019_1712_MOESM1_ESM.pdf [file 41419_2019_1712_MOESM1_ESM.pdf]

## Supporting files 1

---

| Gene Name                  | Nucleotide Sequence                                                                   |
|----------------------------|---------------------------------------------------------------------------------------|
| AQP3 qRT-PCR primer        | sense: 5'-CCTCTGGACACTTGGATATGAT-3'<br>antisense: 5'-GGGACGGGGTTGTTGTAG-3'            |
| CD133 qRT-PCR primer       | sense: 5'-ACATGAAAAGACCTGGGGG-3'<br>antisense: 5'-GATCTGGTGTCCCAGCATG-3'              |
| CD44 qRT-PCR primer        | sense: 5'-CCAGATGGAGAAAGCTCTGA-3'<br>antisense: 5'-GTCATACTGGGAGGTGTTGG-3'            |
| CD90 qRT-PCR primer        | sense: 5'-ACTGCCGCCATGAGAATACC-3'<br>antisense: 5'-CTGGTGAAGTTGGTTCGGGA-3'            |
| EPCAM qRT-PCR primer       | sense: 5'-CTCGCGTTCGGGCTTCT-3'<br>antisense: 5'-TGTAGTTTTACAGACACATTCTTCCT-3'         |
| GADPH qRT-PCR primer       | sense: 5'-ATAGCACAGCCTGGATAGCAACGTAC-3'<br>antisense: 5'-CACCTTCTACAATGAGCTGCGTGTG-3' |
| Lv-AQP3-shRNA1             | sense: 5'-GGATATGATCAATGGCTTCTT-3'                                                    |
| Lv-AQP3-shRNA2             | sense: 5'-CUGUAUUAUGAUUGGAUAUTT-3'                                                    |
| Lv-AQP3-NC                 | sense: 5'-GGATGAGATAACTGAAAGG-3'                                                      |
| CD133 promoter CHIP primer | sense: 5'-CAGTTTACACGCATTGATGA-3'<br>antisense: 5'-AGCAGCAACAGGGAGCCGAG-3'            |

---

## Supporting file 2

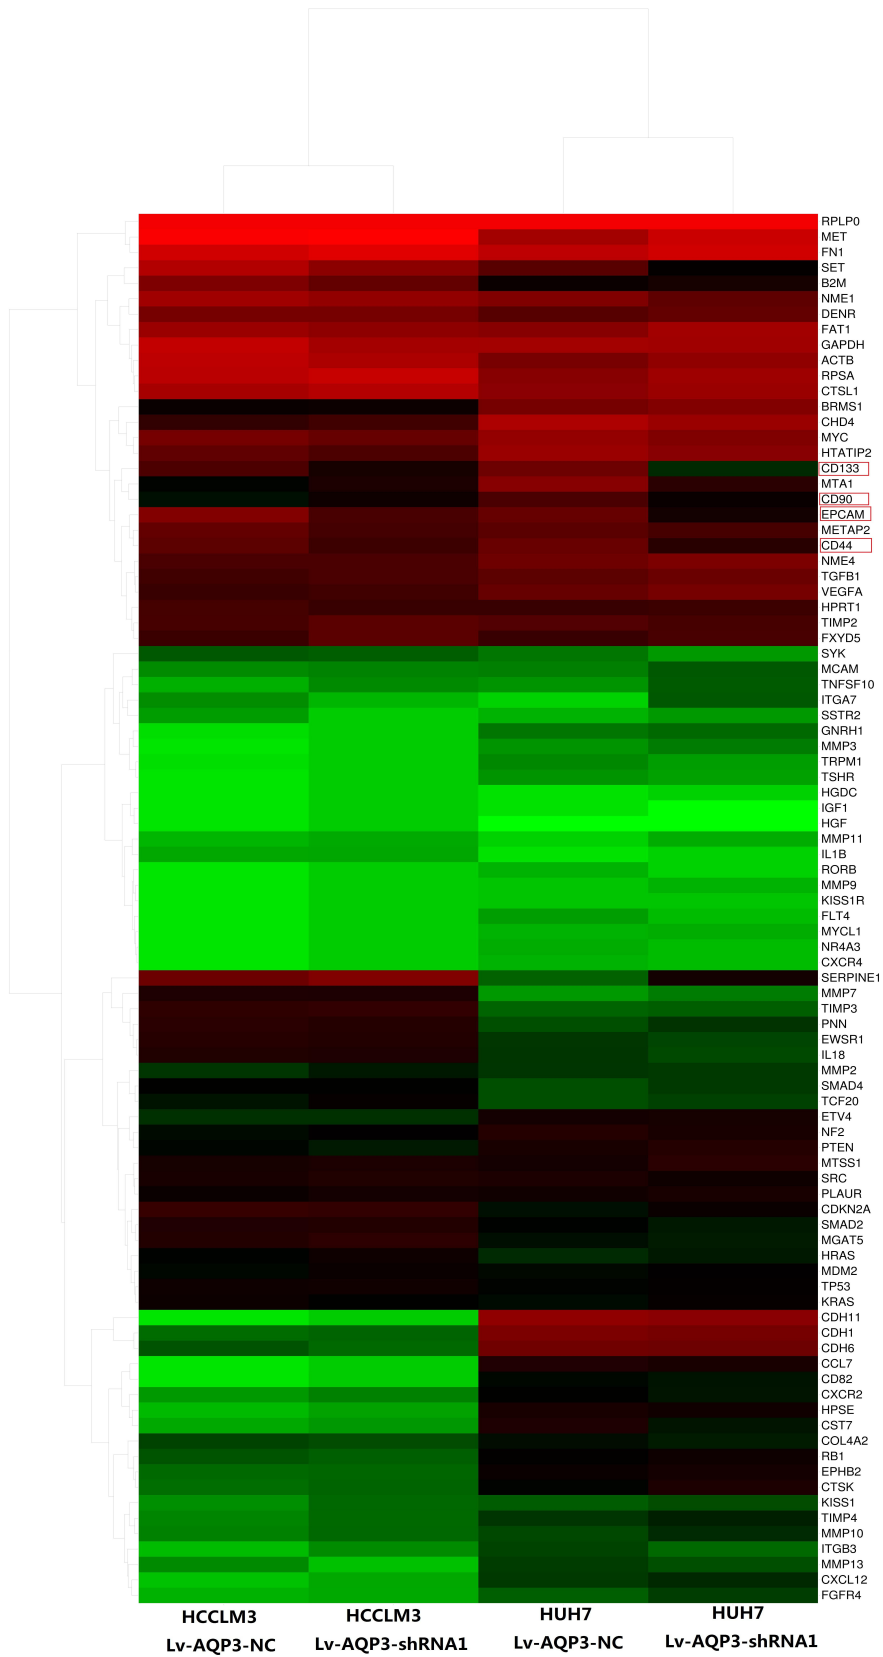

### Supporting file 3

| #ID          | HCCLM3         | HCCLM3           | HCCLM3            |             | HUH7            | HUH7             | HUH7             |             |
|--------------|----------------|------------------|-------------------|-------------|-----------------|------------------|------------------|-------------|
|              | NC             | AQP3-down        | Fold              | Comments    | NC              | AQP3-down        | Fold             | Comments    |
| CDH6         | 0.00065        | 0.0003564        | 1.82491582        | B           | 0.06287         | 0.054            | 1.1642561        | B           |
| BRMS1        | 0.00542        | 0.0055143        | 0.98318916        | OKAY        | 0.068706        | 0.0868108        | 0.7914472        | OKAY        |
| CCL7         | 2.3E-05        | 0.0000363        | 0.62809917        | C           | 0.010129        | 0.0078811        | 1.2852509        | C           |
| <b>CD44</b>  | <b>0.03622</b> | <b>0.0162921</b> | <b>2.22335979</b> | <b>OKAY</b> | <b>0.053291</b> | <b>0.01116</b>   | <b>4.7751344</b> | <b>OKAY</b> |
| CD82         | 2.3E-05        | 0.0000374        | 0.60962567        | B           | 0.003974        | 0.002948         | 1.3478721        | B           |
| CDH1         | 0.00037        | 0.000396         | 0.93636364        | B           | 0.082957        | 0.0648           | 1.2802042        | B           |
| CDH11        | 2.3E-05        | 0.0000363        | 0.62809917        | C           | 0.131991        | 0.10512          | 1.2556223        | C           |
| <b>CD133</b> | <b>0.02628</b> | <b>0.0067199</b> | <b>3.91077248</b> | <b>OKAY</b> | <b>0.057748</b> | <b>0.0171041</b> | <b>3.3762541</b> | <b>OKAY</b> |
| CDKN2A       | 0.01555        | 0.0127578        | 1.21883083        | OKAY        | 0.003295        | 0.0056136        | 0.587033         | OKAY        |
| CHD4         | 0.01382        | 0.0174273        | 0.79310048        | OKAY        | 0.251479        | 0.14814          | 1.6975787        | OKAY        |
| COL4A2       | 0.00095        | 0.0006985        | 1.36234789        | A           | 0.003507        | 0.0023844        | 1.4710165        | A           |
| CST7         | 9.1E-05        | 0.0001243        | 0.73370877        | B           | 0.009797        | 0.002814         | 3.481588         | B           |
| <b>CD90</b>  | <b>0.00305</b> | <b>0.0013486</b> | <b>2.26190123</b> | <b>OKAY</b> | <b>0.026434</b> | <b>0.005448</b>  | <b>4.8519652</b> | <b>OKAY</b> |
| <b>EPCAM</b> | <b>0.08556</b> | <b>0.0219065</b> | <b>3.90558054</b> | <b>OKAY</b> | <b>0.048986</b> | <b>0.0068136</b> | <b>7.1894363</b> | <b>OKAY</b> |
| CTSK         | 0.00035        | 0.0004103        | 0.85400926        | B           | 0.004354        | 0.0081048        | 0.5372223        | B           |
| CTSL1        | 0.19793        | 0.2513038        | 0.78759493        | OKAY        | 0.114751        | 0.148628         | 0.7720709        | OKAY        |
| CXCL12       | 5.2E-05        | 0.0000858        | 0.6013986         | B           | 0.001284        | 0.0017472        | 0.7349311        | B           |
| CXCR2        | 0.00013        | 0.0002112        | 0.61931818        | B           | 0.004758        | 0.0028174        | 1.6889139        | B           |
| CXCR4        | 2.3E-05        | 0.0000363        | 0.62809917        | C           | 7.73E-05        | 5.472E-05        | 1.4126181        | C           |
| DENR         | 0.06575        | 0.058619         | 1.12157492        | OKAY        | 0.034353        | 0.0414           | 0.8297847        | OKAY        |
| EPHB2        | 0.00039        | 0.000385         | 1.02545455        | B           | 0.006244        | 0.007068         | 0.8833553        | B           |
| ETV4         | 0.00149        | 0.0013596        | 1.0988526         | OKAY        | 0.007529        | 0.0073788        | 1.0202916        | OKAY        |
| EWSR1        | 0.01077        | 0.0091465        | 1.17736839        | OKAY        | 0.001359        | 0.0009032        | 1.5045182        | OKAY        |
| FAT1         | 0.14896        | 0.1049301        | 1.41965366        | OKAY        | 0.103558        | 0.178548         | 0.5800012        | OKAY        |
| FGFR4        | 7.3E-05        | 0.0000836        | 0.87559809        | B           | 0.00054         | 0.0010756        | 0.5018582        | B           |
| FLT4         | 2.3E-05        | 0.0000363        | 0.62809917        | C           | 0.000126        | 5.482E-05        | 2.2969172        | C           |
| FN1          | 0.48735        | 0.6913577        | 0.70491903        | OKAY        | 0.358598        | 0.4984776        | 0.7193866        | OKAY        |
| FXYD5        | 0.01678        | 0.0316316        | 0.5305454         | OKAY        | 0.017177        | 0.0234283        | 0.733153         | OKAY        |
| GNRH1        | 2.6E-05        | 0.0000363        | 0.72727273        | B           | 0.000307        | 0.000379         | 0.8113488        | B           |
| HGF          | 2.3E-05        | 0.0000363        | 0.62809917        | C           | 1.22E-05        | 0.0000144        | 0.8493146        | C           |
| HPSE         | 6.2E-05        | 0.0000979        | 0.63738509        | B           | 0.008249        | 0.0064668        | 1.27566          | B           |
| HRAS         | 0.00423        | 0.0056694        | 0.74526405        | OKAY        | 0.001818        | 0.0025747        | 0.7061038        | OKAY        |
| HTATIP2      | 0.04075        | 0.0233167        | 1.74776019        | OKAY        | 0.165914        | 0.1022964        | 1.6218994        | OKAY        |
| IGF1         | 2.3E-05        | 0.0000363        | 0.62809917        | C           | 2.43E-05        | 1.162E-05        | 2.0896821        | C           |
| IL18         | 0.00937        | 0.008074         | 1.16106019        | OKAY        | 0.001424        | 0.0008249        | 1.7268737        | OKAY        |
| IL1B         | 9.4E-05        | 0.000088         | 1.06363636        | B           | 2.27E-05        | 3.815E-05        | 0.5941412        | B           |
| ITGA7        | 0.00017        | 0.0000616        | 2.82467532        | B           | 3.36E-05        | 0.0005876        | 0.0572645        | B           |
| ITGB3        | 0.00006        | 0.0001617        | 0.37105751        | B           | 0.001028        | 0.0003857        | 2.6665299        | B           |
| KISS1        | 0.00017        | 0.0003718        | 0.44540075        | B           | 0.000587        | 0.000751         | 0.7810411        | B           |
| KISS1R       | 2.3E-05        | 0.0000363        | 0.62809917        | C           | 5.79E-05        | 4.547E-05        | 1.2723682        | C           |
| KRAS         | 0.00602        | 0.0041217        | 1.45949487        | OKAY        | 0.003769        | 0.0051224        | 0.7358404        | OKAY        |
| MCAM         | 0.00018        | 0.0002002        | 0.88111888        | B           | 0.000259        | 0.0005876        | 0.4399792        | B           |
| MDM2         | 0.00383        | 0.0052899        | 0.72477741        | OKAY        | 0.003902        | 0.0046488        | 0.8393977        | OKAY        |

|         |         |           |            |      |          |           |           |      |
|---------|---------|-----------|------------|------|----------|-----------|-----------|------|
| MET     | 1.35007 | 1.3542584 | 0.99690694 | OKAY | 0.197307 | 0.4410288 | 0.4473782 | OKAY |
| METAP2  | 0.0419  | 0.0194711 | 2.15180447 | OKAY | 0.038649 | 0.0224094 | 1.7246884 | OKAY |
| MGAT5   | 0.00977 | 0.0115775 | 0.84412006 | OKAY | 0.003464 | 0.0023841 | 1.4528949 | OKAY |
| MMP10   | 0.00023 | 0.0003696 | 0.62337662 | B    | 0.000939 | 0.0016649 | 0.5637326 | B    |
| MMP11   | 6.7E-05 | 0.0000825 | 0.81454545 | B    | 4.03E-05 | 7.857E-05 | 0.5134598 | B    |
| MMP13   | 0.00019 | 0.0000484 | 3.84297521 | B    | 0.001232 | 0.000735  | 1.6756191 | B    |
| MMP2    | 0.00133 | 0.0023353 | 0.56832099 | OKAY | 0.001456 | 0.0011844 | 1.229619  | OKAY |
| MMP3    | 2.3E-05 | 0.0000363 | 0.62809917 | C    | 0.000154 | 0.0002579 | 0.596972  | C    |
| MMP7    | 0.00875 | 0.0079629 | 1.09844403 | OKAY | 0.000138 | 0.0002575 | 0.5343447 | OKAY |
| MMP9    | 2.3E-05 | 0.0000363 | 0.62809917 | C    | 4.73E-05 | 7.049E-05 | 0.6703851 | C    |
| MTA1    | 0.00408 | 0.0073271 | 0.55700072 | OKAY | 0.102132 | 0.0118224 | 8.6388835 | OKAY |
| MTSS1   | 0.00746 | 0.0075856 | 0.98317865 | OKAY | 0.007569 | 0.0118226 | 0.6401777 | OKAY |
| MYC     | 0.06351 | 0.0420288 | 1.51102101 | OKAY | 0.141464 | 0.0822258 | 1.7204397 | OKAY |
| MYCL1   | 2.3E-05 | 0.0000363 | 0.62809917 | C    | 7.6E-05  | 8.892E-05 | 0.8542637 | C    |
| NF2     | 0.00336 | 0.0042669 | 0.78773817 | OKAY | 0.011176 | 0.0078889 | 1.4167013 | OKAY |
| NME1    | 0.1735  | 0.1148246 | 1.51102812 | OKAY | 0.088911 | 0.0385785 | 2.3046872 | OKAY |
| NME4    | 0.02423 | 0.0229955 | 1.053754   | OKAY | 0.060728 | 0.0759094 | 0.8000095 | OKAY |
| NR4A3   | 2.3E-05 | 0.0000363 | 0.62809917 | C    | 8.68E-05 | 5.747E-05 | 1.5094657 | C    |
| PLAUR   | 0.00546 | 0.0065582 | 0.83254552 | OKAY | 0.006985 | 0.007591  | 0.9201855 | OKAY |
| PNN     | 0.01195 | 0.009339  | 1.27953742 | OKAY | 0.000796 | 0.0013506 | 0.5897082 | OKAY |
| PTEN    | 0.00389 | 0.0022869 | 1.70011806 | OKAY | 0.00854  | 0.0102297 | 0.8348549 | OKAY |
| RB1     | 0.00064 | 0.0004609 | 1.39032328 | B    | 0.00518  | 0.0062974 | 0.8225982 | B    |
| RORB    | 2.3E-05 | 0.0000363 | 0.62809917 | C    | 7.43E-05 | 3.104E-05 | 2.3949266 | C    |
| RPSA    | 0.31058 | 0.3835546 | 0.80973921 | OKAY | 0.105004 | 0.1630489 | 0.644001  | OKAY |
| SERPINE | 0.05267 | 0.076813  | 0.68564956 | OKAY | 0.000497 | 0.006759  | 0.0734871 | OKAY |
| SET     | 0.25936 | 0.0992706 | 2.61266478 | OKAY | 0.03586  | 0.0049484 | 7.2467776 | OKAY |
| SMAD2   | 0.00931 | 0.0090211 | 1.0321136  | OKAY | 0.004634 | 0.0025905 | 1.7889883 | OKAY |
| SMAD4   | 0.00444 | 0.004037  | 1.0986376  | OKAY | 0.000788 | 0.001185  | 0.6652517 | OKAY |
| SRC     | 0.00777 | 0.0085932 | 0.9047619  | OKAY | 0.008842 | 0.0062901 | 1.4056181 | OKAY |
| SSTR2   | 0.00012 | 0.0000363 | 3.33884298 | B    | 7.17E-05 | 0.0001282 | 0.5592614 | B    |
| SYK     | 0.00059 | 0.0004741 | 1.2453069  | B    | 0.000314 | 0.0001351 | 2.3267046 | B    |
| TCF20   | 0.00293 | 0.0048004 | 0.60944921 | OKAY | 0.000792 | 0.0010229 | 0.7746619 | OKAY |
| TGFB1   | 0.01955 | 0.0223663 | 0.87393981 | OKAY | 0.040344 | 0.0506147 | 0.7970886 | OKAY |
| TIMP2   | 0.02277 | 0.0320727 | 0.70983734 | OKAY | 0.031435 | 0.0227489 | 1.381821  | OKAY |
| TIMP3   | 0.01308 | 0.0127578 | 1.0248789  | OKAY | 0.000471 | 0.0005108 | 0.9223718 | OKAY |
| TIMP4   | 0.00021 | 0.0003564 | 0.58249158 | B    | 0.001438 | 0.0022228 | 0.6470266 | B    |
| TNFSF10 | 7.7E-05 | 0.0001727 | 0.4447018  | B    | 0.000159 | 0.0005504 | 0.2882992 | B    |
| TP53    | 0.00614 | 0.0059103 | 1.0393381  | OKAY | 0.00439  | 0.0049904 | 0.8797277 | OKAY |
| TRPM1   | 2.6E-05 | 0.0000363 | 0.72727273 | B    | 0.000202 | 0.0001185 | 1.7069822 | B    |
| TSHR    | 2.3E-05 | 0.0000363 | 0.62809917 | C    | 0.000159 | 0.0001023 | 1.5512902 | C    |
| VEGFA   | 0.0161  | 0.0173074 | 0.93012238 | OKAY | 0.04967  | 0.0629015 | 0.7896439 | OKAY |
| ACTB    | 0.32377 | 0.1971684 | 1.64209072 | OKAY | 0.076438 | 0.1231049 | 0.6209202 | OKAY |
| B2M     | 0.07818 | 0.0381414 | 2.04986707 | OKAY | 0.006304 | 0.0074825 | 0.8424746 | OKAY |
| GAPDH   | 0.38237 | 0.1704593 | 2.24316303 | OKAY | 0.199307 | 0.1711055 | 1.1648199 | OKAY |
| HPRT1   | 0.02154 | 0.0149622 | 1.43946746 | OKAY | 0.017126 | 0.0175047 | 0.9783907 | OKAY |
| RPLP0   | 1       | 1         | 1          | OKAY | 1        | 1         | 1         | OKAY |
| HGDC    | 2.3E-05 | 0.0000363 | 0.62809917 |      | 2.84E-05 | 3.859E-05 | 0.736133  |      |
